# 1 **Ion exchange biomaterials to capture daptomycin** 2 **and prevent resistance evolution in off-target** 3 **bacterial populations**

4 *Shang-Lin Yeh,<sup>1</sup> Naveen Narasimhalu,<sup>1</sup> Landon G. vom Steeg,<sup>2</sup> Joy Muthami,<sup>1</sup> Sean LeConey,<sup>1</sup>*  
5 *Zeming He,<sup>1</sup> Mica Pitcher,<sup>1,3</sup> Harrison Cassady,<sup>4</sup> Valerie J. Morley,<sup>2, 8</sup> Sung Hyun Cho,<sup>5</sup> Carol*  
6 *Bator,<sup>5</sup> Roya Koshani,<sup>1</sup> Robert J. Woods,<sup>6</sup> Michael Hickner,<sup>1,4</sup> Andrew F. Read,<sup>2,5</sup> Amir Sheikhi<sup>1,7\*</sup>*

7

8 <sup>1</sup>Department of Chemical Engineering, The Pennsylvania State University, University Park, PA  
9 16802, USA

10 <sup>2</sup>Department of Biology and Entomology, The Pennsylvania State University, University Park, PA  
11 16802, USA

12 <sup>3</sup>Department of Chemistry, The Pennsylvania State University, University Park, PA 16802, USA

13 <sup>4</sup>Department of Materials Science and Engineering, The Pennsylvania State University, University  
14 Park, PA 16802, USA

15 <sup>5</sup>Huck Institutes of the Life Sciences, The Pennsylvania State University, University Park, PA  
16 16802, USA

17 <sup>6</sup>Department of Internal Medicine, University of Michigan, Ann Arbor, MI 48109, USA

18 <sup>7</sup>Department of Biomedical Engineering, The Pennsylvania State University, University Park, PA  
19 16802, USA

20 <sup>8</sup>Present address: NTx, 7701 Innovation Way, NE Rio Rancho, NM 87144

21 \*Corresponding Author: Amir Sheikhi ([sheikhi@psu.edu](mailto:sheikhi@psu.edu))

22 **Keywords:** antibiotic stewardship, daptomycin, ion exchange, cholestyramine, biomaterial

23

24 **Abstract**

25 Daptomycin (DAP), a cyclic anionic lipopeptide antibiotic, is among the last resorts to treat  
26 multidrug resistant (vancomycin resistant *Enterococcus faecium* or methicillin resistant  
27 *Staphylococcus aureus*) Gram-positive bacterial infections. DAP is administered intravenously  
28 and biliary excretion results in the introduction of DAP (~5-10 % of the intravenous DAP dose)  
29 arriving in the gastrointestinal (GI) tract where it drives resistance evolution in off-target  
30 populations of *Enterococcus faecium* bacteria. Previously, we have shown that the oral  
31 administration of cholestyramine, an ion exchange biomaterial (IXB) sorbent, prevents DAP  
32 treatment from enriching DAP-resistance in populations of *E. faecium* shed from mice. Here, we  
33 engineer the biomaterial-DAP interfacial interactions to uncover the antibiotic removal  
34 mechanisms. The IXB-mediated DAP capture from aqueous media was measured in both  
35 controlled pH/electrolyte solutions and in simulated intestinal fluid (SIF) to uncover the molecular  
36 and colloidal mechanisms of DAP removal from the GI tract. Our findings show that the IXB  
37 electrostatically adsorbs the anionic antibiotic via a time-dependent diffusion-controlled process.  
38 Unsteady-state diffusion-adsorption mass balance describes the dynamics of adsorption well, and  
39 the maximum removal capacity is beyond the electric charge stoichiometric ratio because of DAP

40 self-assembly. This study may open new opportunities for optimizing cholestyramine adjuvant  
41 therapy to prevent DAP resistance, as well as designing novel biomaterials to remove off-target  
42 antibiotics from the GI tract.

43

## 44 1. Introduction

45 Daptomycin (DAP) is an important first-line antibiotic for the treatment of multidrug resistant  
46 Gram-positive bacteria like vancomycin resistant *Enterococcus faecium* (VRE*fm*), a leading cause  
47 of hospital acquired infections.<sup>1</sup> The excellent therapeutic capability of DAP is currently threatened  
48 by increasing frequencies of DAP resistance in VRE*fm* worldwide.<sup>2,3</sup> *E. faecium* normally  
49 asymptotically colonizes gastrointestinal (GI) tracts; transmission is fecal-oral.<sup>4</sup> GI colonization  
50 is a key risk factor for clinical infections,<sup>5</sup> such as blood stream infections or endocarditis, which  
51 can be life threatening.<sup>6</sup>

52 DAP is administered intravenously (IV) to treat VRE*fm* and other Gram-positive blood  
53 stream infections. Most DAP is excreted via urine, but 5-10 % enters the GI tract through biliary  
54 excretion, where it has no therapeutic value.<sup>1</sup> We have found that DAP resistance was present in  
55 GI VRE*fm* populations in patients who had received IV DAP therapy, and not in case-matched  
56 patients who received a different antibiotic.<sup>7</sup> This is consistent with off-target selection for  
57 resistance, where antibiotic use causes resistance evolution in a population of bacteria that are not

58 the therapeutic target. Direct experimental evidence of off-target selection comes from mouse  
59 models: systemic DAP treatment enriched for DAP-resistant VRE $f_m$  in the GI tract and up-selected  
60 a variety of *de novo* resistance mutations that confer DAP resistance.<sup>8,9</sup> This raises the prospect  
61 that inactivation of DAP in the GI tract would prevent the evolution of DAP resistance without  
62 interfering with the capacity of DAP to treat bloodstream infections. This would reduce the risk  
63 that patients would acquire DAP-resistant VRE $f_m$  from their carriage populations in their own GI  
64 tract, as well as prevent the onward transmission of DAP resistance in this important hospital-  
65 acquired infection. Capture of GI DAP would also prevent DAP-induced perturbations of GI  
66 microbiota that are associated with the expansion of populations of other disease-causing  
67 infections such as *Clostridium difficile*, and many other disease states associated with the  
68 microbiome.<sup>10</sup>

69 DAP is a cyclic lipopeptide antibiotic, which is produced via fermentation involving decanoic  
70 acid-spiked *Streptomyces roseosporus* growth media.<sup>11</sup> DAP is amphiphilic, composed of 13  
71 amino acids forming a hydrophilic head connected to a decanoyl fatty acid as a lipophilic tail.<sup>12</sup> It  
72 also contains four carboxyl groups, which bear pH-dependent charge. Although the mechanism of  
73 the DAP-mediated Gram-positive bacterial cell death is poorly understood,<sup>13</sup> it is believed that the  
74 binding between DAP and the target bacterial cell membrane is associated with bacterial death.<sup>13</sup>  
75 Mediated by hydrophobic interactions between the lipid chain of DAP and phospholipid cell

76 membrane, DAP is inserted into the bacterial cell membrane, depolarizing it, and compromising  
77 the intracellular components.<sup>14</sup> In addition, the antibacterial action of DAP depends on calcium  
78 ion-mediated aggregation of hydrophilic head, leading to conformational changes that induce DAP  
79 interactions with the bacterial membrane.<sup>15</sup>

80 Inactivating DAP in the intestines without reducing DAP plasma concentrations would  
81 enable the IV use of DAP to eliminate bacteria in the infection sites without driving resistance in  
82 the GI tract populations. We have previously shown that feeding mice with an ion exchange  
83 biomaterial (IXB) sorbent, cholestyramine, reduced DAP-induced enrichment and shedding of  
84 DAP-resistant *VREfm* by 80-fold<sup>16</sup> and completely prevented the emergence and shedding of *de*  
85 *novo* resistance mutations.<sup>8,9</sup> However, the mechanism by which this oral adjuvant prevents DAP  
86 activity is unclear.

87 In this work, we aim to uncover and engineer the IXB-mediated DAP capture mechanisms  
88 via conducting *in vitro* antibiotic removal experiments in aqueous media with controlled pH, ion  
89 types, ionic strengths, bile salt, and phospholipid content as well as in simulated intestinal fluid  
90 (SIF). Additionally, the time-dependent antibiotic removal will be modeled to identify the role of  
91 adsorption and diffusion. The effect of IXB size on the removal efficacy is further investigated to  
92 unravel the effect of diffusion in the sequestration process. Understanding these foundations may  
93 help rationally design the next generation of antibiotic sorbents to prevent antimicrobial resistance,

94 as well as help optimize the use of cholestyramine itself as an oral adjuvant therapy for resistance  
95 prevention.

96

## 97 **2. Materials and methods**

### 98 **2.1. Materials**

99 Daptomycin (DAP, > 94 %) was purchased from Tokyo Chemical Industry, Japan. Sodium  
100 chloride (NaCl, > 99.5 %), calcium chloride dihydrate ( $\text{CaCl}_2 \cdot 2\text{H}_2\text{O}$ , for molecular biology,  $\geq$   
101 99.0 %), sodium hydroxide (NaOH, ACS Reagent, > 97 %), hydrochloric acid (HCl, ACS reagent,  
102 37 %), L- $\alpha$ -Lecithin (a concentrate of soybean lecithin consisting of more than 94 wt%  
103 phosphatidylcholine and less than 2 wt% triglyceride), phosphate buffer ( $\text{NH}_4\text{H}_2\text{PO}_4$ ), acetonitrile  
104 ( $\text{CH}_3\text{CN}$ , HPLC grade, > 99.9 %), cellulose acetate centrifuge tube filters (pore size = 0.22  $\mu\text{m}$ ),  
105 cholestyramine resin (IXB, Dowex® 1x2 Cl<sup>-</sup> Form), and polymer resin AmberChrom 1x4 (AC4)  
106 were purchased from Sigma-Aldrich, USA. Maleic acid ( $\text{C}_4\text{H}_4\text{O}_4$ , > 98 %) was purchased from  
107 Beantown Chemical Corporation, USA. Sodium taurocholate ( $\text{C}_{26}\text{H}_{44}\text{NNaO}_7\text{S}$ ) was procured from  
108 Spectrum Chemical, USA. Fasted state simulated intestinal fluid (FaSSIF-V2) powder was  
109 supplied from Biorelevant, UK. Milli-Q water with a resistivity of 18.2 m $\Omega$  cm was generated  
110 from the deionized water passing through an ultrafilter (Biopak Polisher, Millipore, USA). Cation-

111 adjusted Mueller Hinton II Broth (BD Difco) was used as a bacterial culture medium and was  
112 purchased from Becton, USA. *Enterococcus faecium* (*E. faecium*), strain BL00239-1, was  
113 obtained from a blood stream infection in a patient being treated at the University of Michigan  
114 hospital.<sup>9</sup>

115

## 116 **2.2. Methods**

### 117 **2.2.1 Cryogenic transmission electron microscopy (cryo-TEM)**

118 DAP dispersion, IXB suspension, and DAP-IXB suspension were vitrified using a Vitrobot  
119 (Thermo Fisher Scientific, USA), for which the chamber was preconditioned to 4°C and 100 %  
120 relative humidity. Holey carbon Quantifoil grids (2 µm diameter with an interspace of 2 µm,  
121 Quantifoil Micro Tools GmbH, Germany) were prepared by glow discharge (easyGlow® System,  
122 Pelco, USA), to which 3.5 µL of samples (0.1 w/v %) were deposited and blotted, immediately  
123 followed by plunging into liquid ethane. Cryo-TEM images were acquired using a Talos Arctica  
124 TEM (Thermo Fisher Scientific, USA), which was equipped with Falcon 4 Direct Electron  
125 Detector (Thermo Fisher Scientific, USA) and controlled by EPU software (Thermo Fisher  
126 Scientific, USA, version 2.12.0.2771REL). Imaging conditions were as follows: 200 kV; 57,000x  
127 in magnification; counted mode; total dose = 15 e/A<sup>2</sup>; nano probe; spot size = 3; and C2 aperture  
128 = 50.

## 129 **2.2.2 Preparation of IXB with different particle sizes**

130 Polymer resin AC4s were milled to obtain different particle size distribution samples using a  
131 CryoMill (Retsch, Germany). Dry resins did not mill well, so samples were exposed to ambient  
132 air for a minimum of 2 h to absorb moisture before grinding. The samples were then milled using  
133 a steel ball, at milling frequencies varied between 20 Hz to 30 Hz, and milling times ranging from  
134 30 s to 8 min. The parameters were adjusted to provide different particle size distributions, which  
135 were then characterized by scanning electron microscopy (SEM, ThermoFisher Verios G4, USA).  
136 After milling, the resins were soaked in a NaCl solution (3 M) overnight. The resins were then  
137 washed three times with deionized water, including an overnight soak, and then air-dried under  
138 fume hood. Particle size distribution of resin was determined by SEM imaging. After imaging,  
139 particle size was determined by the ImageJ software (version Java 1.53e).<sup>16</sup>

## 140 **2.2.3 Simulated intestinal fluid (SIF) preparation**

141 To mimic intestinal fluid *in vitro*, fasted state simulated intestinal fluid (FaSSIF) and fed state  
142 simulated intestinal fluid (FeSSIF) were prepared based on standard protocols.<sup>17</sup> Sodium  
143 taurocholate was selected as cholic acid is among the most common bile acids in human bile.<sup>18</sup> To  
144 prepare the FaSSIF, 1.392 g of NaOH pellets, 2.22 g of maleic acid, and 4.01 g of NaCl were  
145 dissolved in 0.99 L of Milli-Q water. Then, the pH of solution was adjusted to 6.5 using a NaOH  
146 solution (0.1 M), and the total volume was increased to 1 L with Milli-Q water. The solution was



147 then added to 1.79 g of FaSSIF-V2 powder and stirred for 1 h at room temperature. To prepare the  
148 FeSSIF solution, 8.25 g of sodium taurocholate was added to 250 mL of FaSSIF solution and  
149 stirred at room temperature to completely dissolve the sodium taurocholate. Then, 2.95 g of  
150 lecithin was added and continued stirring for 4 h to form a clear solution. The final volume was  
151 adjusted to 1 L with the rest of FaSSIF solution.

#### 152 **2.2.4 DAP removal**

153 The DAP removal experiments were conducted in a batch process. DAP stock solutions were  
154 prepared by dissolving 100 mg of DAP in 5 mL of Milli-Q water (concentration = 20 mg mL<sup>-1</sup>).  
155 Then, DAP solutions with varying concentrations ranging from 1 mg mL<sup>-1</sup> to 20 mg mL<sup>-1</sup> were  
156 prepared by the successive dilution of stock solution with Milli-Q water. The solution pH was  
157 adjusted to 6.5 by adding a NaOH solution (0.5 M). The IXB (cholestyramine or AC4, 8 mg) were  
158 added to the DAP solution, followed by vortexing for 5 min and placing the vial on the nutating  
159 mixer (Fisherbrand, USA) to agitate at 60 rpm for a desired incubation time depending on the type  
160 of experiments. The samples were centrifuged at 5000 ×g for 5 min, and the supernatant was  
161 collected and assessed using a UV-vis spectrophotometer (Tecan Model Infinite 200 Pro, USA) at  
162  $\lambda_{\max}$  = 364 nm to measure the unabsorbed DAP concentration.

#### 163 **2.2.5 UV-vis spectroscopy for DAP concentration measurement**

164 To measure the DAP concentration, calibration curves were obtained for each experimental  
165 condition (14 calibration curves, shown in **Figure S1**) by recording the absorbance of DAP  
166 solutions with predetermined concentrations ranging from 0.05 mg mL<sup>-1</sup> to 20 mg mL<sup>-1</sup> at  $\lambda_{\text{max}}=$   
167 364 nm using the UV-vis spectrophotometer. The kynurenine residue in DAP causes the  
168 absorbance peak at 364 nm<sup>19</sup>. The calibration curves were used to determine the concentration of  
169 DAP in the supernatant after adsorption by the IXB.

### 170 **2.2.6 High-performance liquid chromatography (HPLC) for DAP concentration** 171 **measurement**

172 The HPLC (HP 1000, Thermo Fisher, USA) equipped with UV detector set at 224 nm was  
173 used to measure DAP concentrations below 50 mg L<sup>-1</sup>. The mobile phase consisted of ammonium  
174 phosphate buffer (NH<sub>4</sub>H<sub>2</sub>PO<sub>4</sub>) (40 mM, pH 4.0), and acetonitrile/water (10:90 v/v).  
175 Chromatographic separation was achieved using an Agilent Zorbax<sup>TM</sup> C<sub>18</sub> analytical column  
176 (Length: 150 mm, inner diameter: 4.6 mm, particle size: 5  $\mu$ m) (Agilent<sup>TM</sup>, USA). The volume  
177 of the injection was 20  $\mu$ L and the flow rate was 0.5 mL min<sup>-1</sup>. Column temperature was  
178 maintained at 25 °C. The peak areas detected at 224 nm were defined as analytical signs, with  
179 detection concentration varying from 5 mg L<sup>-1</sup> to 200 mg L<sup>-1</sup> set as calibration line (**Figure S2**).

### 180 **2.2.7 Antibiotic removal kinetics**

181 To investigate the DAP adsorption kinetics, DAP solutions with a concentration of 8 mg mL<sup>-1</sup>  
182 were prepared (pH = 6.5 adjusted using 0.5 M NaOH, total volume 1 mL). Then, IXB (8 mg)  
183 was added to them, followed by vortexing for 5 min and placing them on the nutating mixer to  
184 agitate at 60 rpm for up to 24 h. At each time point, the samples were centrifuged at 5000 ×g for  
185 5 min, and the supernatant was collected and assessed using the UV-vis spectrophotometer at λ<sub>max</sub>=  
186 364 nm to measure the DAP concentration in the supernatant. The DAP removal capacity of IXB  
187 was calculated based on equation (Eqn.) 1:

$$q = \frac{(C_0 - C)}{m} \times V \quad (1)$$

188 where  $q$  (mg g<sup>-1</sup>) denotes the mass of DAP adsorbed per 1 g of IXB at time  $t$ ,  $m$  is the mass of IXB  
189 (g),  $C_0$  (mg mL<sup>-1</sup>) is the initial concentration of DAP, and  $C$  (mg mL<sup>-1</sup>) is the concentration of DAP  
190 in the supernatant at time  $t$ .

### 191 2.2.8 Equilibrium adsorption

192 Equilibrium batch adsorption measurements were performed to obtain the maximum DAP  
193 removal capacity of IXB. One mL of DAP solution with desired concentrations ranging from 1 to  
194 20 mg mL<sup>-1</sup> were prepared (pH = 6.5 adjusted by 0.5 M NaOH), and 8 mg of IXB was added to  
195 them. The solutions were then vortexed for 5 min and placed on the nutating mixer with a 60 rpm  
196 agitation speed for 4 h. The samples were centrifuged at 5000 ×g for 5 min, the supernatants were  
197 collected and assessed using the UV-vis spectrophotometer at λ<sub>max</sub>= 364 nm to measure DAP

198 concentration. Removal percentage ( $R$ , %) and equilibrium removal capacity ( $q_e$ , mg mL<sup>-1</sup>) were  
199 calculated using **Eqns. 2** and **3**, respectively:

$$R \% = \frac{(C_0 - C_e)}{C_0} \times 100\% \quad (2)$$

$$q_e = \frac{(C_0 - C_e)}{m} \times V \quad (3)$$

200 where  $C_0$  (mg mL<sup>-1</sup>) denotes initial DAP concentration,  $C_e$  (mg mL<sup>-1</sup>) is the equilibrium DAP  
201 concentration after removal,  $m$  (g) is the IXB mass, and  $V$  (mL) represents the total volume of  
202 solution.

### 203 **2.2.9 Effect of pH on the antibiotic removal**

204 The IXB-mediated removal of DAP (8 mg mL<sup>-1</sup>) at pH ~ 1.2 - 12 was investigated to examine  
205 the effects of functional group ionization on IXB-DAP interactions. The pH of DAP solutions was  
206 adjusted by adding HCl (0.5 M) or NaOH (0.5 M) solutions to the DAP stock solution. Then, 8  
207 mg of IXB was added to the DAP solutions with varying pH, followed by vortexing for 5 min and  
208 placing them on the nutating mixer with 60 rpm agitation speed for 4 h. The DAP concentration  
209 was measured by collecting the supernatant after centrifugation at 5000 ×g for 5 min, followed  
210 by measuring using the UV-vis spectrophotometer at  $\lambda_{\max}$  = 364 nm. The removal percentage and  
211 capacity were calculated based on **Eqns. 2** and **3**, respectively.

### 212 **2.2.10 Effect of ionic strength and ion type on the antibiotic removal**

213 To investigate the effect of monovalent and divalent ions on the IXB-DAP interactions, the  
214 IXB-mediated removal of DAP ( $8 \text{ mg mL}^{-1}$ ) at varying NaCl and CaCl<sub>2</sub> concentrations ranging  
215 from 10 mM to 500 mM was investigated. In this experiment, the pH of all DAP solutions was  
216 maintained constant at 6.5 using a NaOH solution (0.5 M). Eight mg of IXB was added to the DAP  
217 solutions containing varying concentrations of sodium (Na<sup>+</sup>) or calcium (Ca<sup>2+</sup>) ions. The solutions  
218 were then vortexed for 5 min and placed on the nutating mixer with 60 rpm agitation speed for 4  
219 h. The DAP concentration in the supernatant was quantified by collecting the supernatant after  
220 centrifugation at  $5000 \times g$  for 5 min and measuring the absorbance using the UV-vis  
221 spectrophotometer at  $\lambda_{\text{max}}=364 \text{ nm}$ . The removal percentage and capacity were calculated using  
222 **Eqns. 2 and 3**, respectively.

### 223 **2.2.11 Effects of SIF components on the antibiotic removal**

224 The IXB-mediated removal of DAP ( $8 \text{ mg mL}^{-1}$ ) at varying concentrations of maleic acid (5-  
225 100 mM), bile acid (1-12 mM), and lecithin (0.5-4 mM) was determined to investigate the  
226 influence of SIF components on the IXB-DAP interactions. For these experiments, the pH of DAP  
227 solutions was adjusted to 6.5 using a NaOH solution (0.5 M). Eight mg of IXB was added to the  
228 DAP solutions containing each of the SIF components at varying concentrations. The solutions  
229 were then vortexed for 5 min and placed on the nutating mixer with 60 rpm agitation speed for 4  
230 h. The DAP concentration was measured by collecting the supernatant after centrifugation at 5000

231  $\times g$  for 5 min, followed by recording the absorbance using the UV-vis spectrophotometer at  
232  $\lambda_{\max}=364$  nm. The removal percentage and capacity were calculated using **Eqns. 2** and **3**,  
233 respectively.

#### 234 **2.2.12 Fourier-transform infrared (FTIR) spectroscopy**

235 The functional groups of DAP, IXB, and DAP-IXB complex were identified using a FTIR  
236 spectrometer (ThermoFisher, Pleasantville, NY), equipped with a Diamax attenuated total  
237 reflectance (ATR) accessory. The samples were dried in an oven overnight at 50°C to remove  
238 water. Samples were placed directly onto the ATR crystal fixed at an incident angle of 45°, and  
239 maximum pressure was applied by lowering the tip of pressure clamp. The recorded spectra were  
240 averaged from a total of 500 scans at transmission mode ranging from 4000  $\text{cm}^{-1}$  to 500  $\text{cm}^{-1}$  and  
241 a resolution of 6  $\text{cm}^{-1}$ .

#### 242 **2.2.13 Hydrodynamic size measurement by dynamic light scattering (DLS)**

243 The hydrodynamic size of DAP was measured using DLS (Malvern Zetasizer Nano series,  
244 UK) at 90° scattering angle and ambient temperature based on the *z*-average (cumulants mean) of  
245 intensity measurements. The concentration of DAP stock solution was adjusted to 0.1 w/v % using  
246 Milli-Q water. Then, the solutions were transferred to low-volume quartz cuvettes (ZEN2112) for  
247 conducting the measurements.

#### 248 **2.2.14 $\zeta$ -potential measurement by electrophoretic light scattering (ELS)**

249 The  $\zeta$ -potential of DAP was determined by measuring the electrophoretic mobility using  
250 Nano ZS Zetasizer (Malvern Instruments, UK). For measuring the  $\zeta$ -potential, the DAP  
251 concentration was first adjusted to 0.1 w/v % by diluting the DAP stock solution (2 w/v %) using  
252 Milli-Q water. The solution pH was adjusted to 6.5 by adding NaOH (2 M), and then the solution  
253 was transferred to the universal dip cell kit. Since the DAP size was  $> 200$  nm and the final  
254 electrolyte concentration was  $> 1$  mM, the  $\kappa$  value was in the order of 1-10 nm, and the  $\kappa a$  was  $\gg$   
255 100 ( $\kappa$  is the Debye-Hückel parameter, and  $a$  is the radius of the particle), thus the  $\zeta$ -potential can  
256 be calculated by applying electrophoretic mobility to Smoluchowski equation.<sup>20</sup>

#### 257 **2.2.15 Evaluating antibiotic activity of uncaptured DAP using broth microdilution assays**

258 Broth microdilution assays were used to directly quantify the effects of IXB on the antibiotic  
259 activity of DAP against patient-driven *Enterococcus faecium* (*E. faecium*). Antibiotic capture was  
260 performed in Milli-Q water at a pH of 6.5 prior to centrifugation at  $16,300 \times g$  for 5 min and  
261 passage of the supernatant through a cellulose acetate filter (pore size =  $0.22 \mu\text{m}$ ). All assays were  
262 conducted in accordance with the guidelines of the Clinical Laboratory Standards Institute,<sup>21</sup> while  
263 using a previously isolated DAP-susceptible BL00239-1-S (Minimum Inhibitory Concentration  
264 (MIC) =  $2.1 \mu\text{g mL}^{-1}$ ) isolate.<sup>9</sup> Initial DAP concentrations (*i.e.*, the DAP concentration prior to  
265 antibiotic capture) were used to generate the 2-fold serial DAP dilutions. After incubation at  $35^\circ\text{C}$   
266 for 24 h, bacterial cell densities were measured using a plate reader (BioTek Synergy H1 Plate

267 reader, Agilent Technology, USA) at an optical density of 600 nm. The resulting optical density  
268 values were fitted to a Hill function as described previously,<sup>7</sup> with reductions in initial DAP  
269 concentration resulting in a right-shift in the growth curve.

270

### 271 **3. Results and discussion**

#### 272 **3.1 IXB-mediated DAP removal kinetics**

273 **Figure 1a** presents the chemical structure of DAP and IXB respectively. To understand the  
274 interactions between DAP and IXB, the morphology of DAP, IXB, and the DAP-IXB complex  
275 was analyzed using cryo-TEM. As shown in **Figure 1b**, DAP formed sphere-like self-assembled  
276 particles with an average diameter of  $112 \pm 31$  nm (68 particles), which is a result of hydrophobic  
277 tail-mediated micelle formation.<sup>22</sup> The formation of such spherical micelles or aggregates have  
278 been reported at DAP concentrations higher than the critical micelle concentration  $CMC \sim 0.147$   
279  $mg\ mL^{-1}$ .<sup>22</sup> Since the average size of IXB (cholestyramine) is around  $20\ \mu m$  (as examined using  
280 an optical microscope shown in **Figure S3**), only the edge of IXB was imaged by cryo-TEM. The  
281 purple dashed lines in **Figure 1b** show the boundary of IXB. At the edge of DAP-IXB complex,  
282 layers of electron-dense materials (shown with red arrows) were observed, which may be attributed  
283 to the DAP layer at the interface. When DAP micelles contact a solid substrate, they may fuse



284 together and eventually rupture to form a supported lipid bilayer (SLBs) on IXB. It has been shown  
285 that the spreading of amphiphilic molecules on solid supports may yield SLBs.<sup>23,24</sup>

286 The IXB-mediated DAP removal was conducted by incubating IXB with DAP in Milli-Q  
287 water. To investigate the time scale of DAP removal at initial DAP concentrations above or below  
288 CMC, the effect of incubation time on the removal percentage ( $R\%$ ) and capacity ( $q$ ) of IXB was  
289 studied, as presented in **Figure 1**. **Figure 1c** presents  $R$  and  $q$  at DAP concentrations above the  
290 CMC. Both  $R$  and  $q$  significantly increased by increasing the incubation time and reached a plateau  
291 after about 4 h. The  $q$  reached a plateau value of  $\sim 1000 \text{ mg g}^{-1}$  after 4 h, i.e., the maximum removal  
292 capacity ( $q_e$ ) equivalent to 100% DAP removal. Similarly, at DAP concentrations below the CMC  
293 (**Figure 1d**),  $R$  and  $q$  increased by increasing the incubation time within 4 h and reached their  
294 plateau values of 100% and  $\sim 800 \text{ mg g}^{-1}$ , respectively, after 4 h. No significant difference between  
295 the IXB saturation time below and above CMC was observed. Therefore, the required time ( $\sim 4 \text{ h}$ )  
296 to reach the maximum  $q_e$  may not be attributed to the DAP fusion and SLB formation. We  
297 hypothesize that the time-dependent adsorption of DAP is a result of molecular diffusion into the  
298 IXB pores. To test this hypothesis, we mathematically model the removal of DAP in the next  
299 section.

300

301

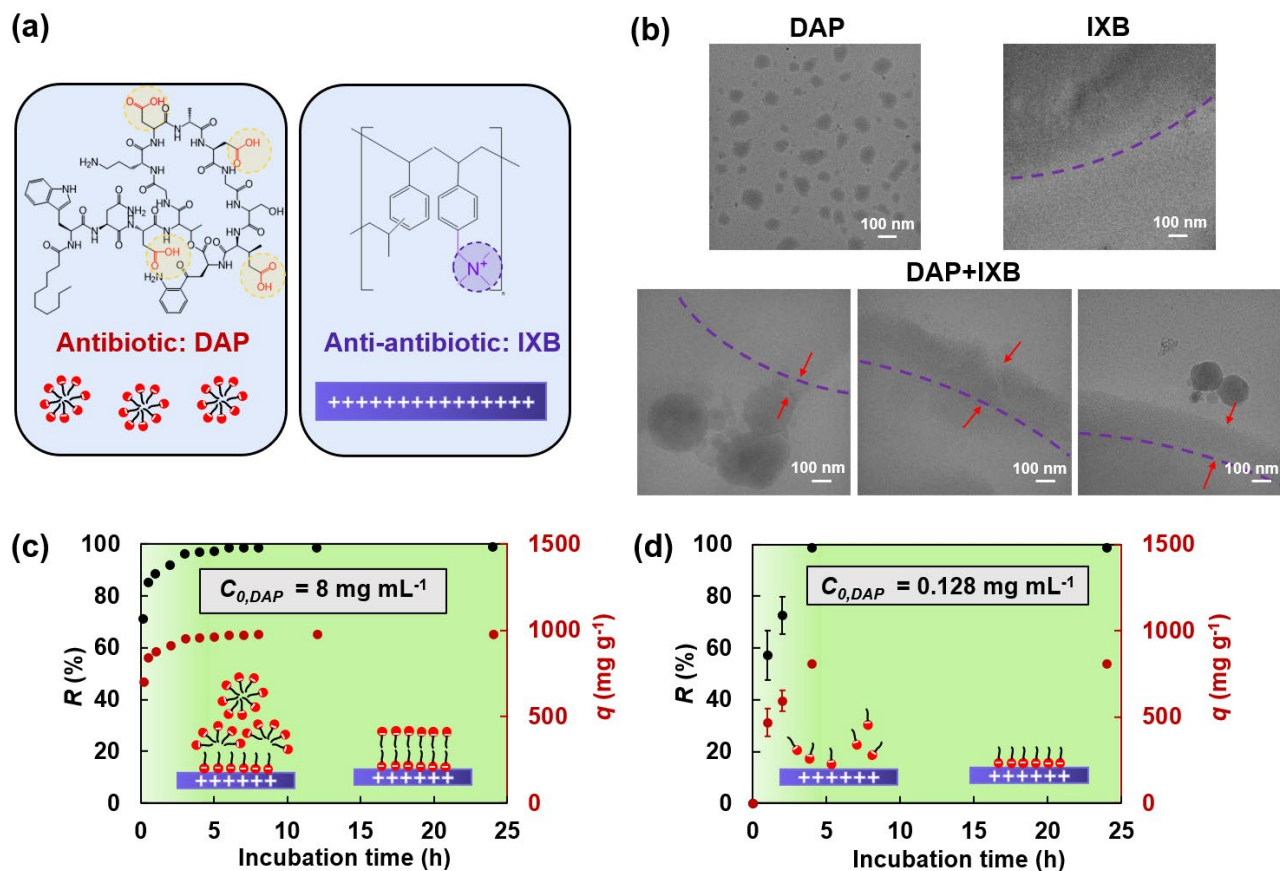

302

303 **Figure 1. Kinetics of IXB-mediated DAP removal. (a)** Chemical structure of the antibiotic (DAP)

304 and the anti-antibiotic (IXB) **(b)** Cryo-TEM images of DAP, IXB, and DAP-IXB complex.

305 Kinetics of DAP removal percentage ( $R$ ) and capacity ( $q$ ) of IXB at DAP concentrations of **(c)** 8

306  $\text{mg mL}^{-1}$  or **(d)**  $0.128 \text{ mg mL}^{-1}$ . The CMC of DAP is  $0.147 \text{ mg mL}^{-1}$ . The insets schematically

307 show the adsorption of DAP micelles (panel c, DAP concentration  $>$  CMC) or molecules (panel b,

308 DAP concentration  $<$  CMC) to the IXB.

309

### 310 **3.2 Mathematical and experimental modeling of IXB-mediated DAP removal**

311 Since IXB is a porous, swollen polymer resin,<sup>25</sup> we considered the dynamic diffusion-  
312 adsorption of DAP molecules to model the process. We assumed that the IXB is spherical with no  
313 tortuosity. In addition, the DAP mass transfer resistance from the bulk solution to the outer IXB  
314 surface is negligible since the solution is well mixed. Accordingly, the bulk DAP concentration  
315 ( $C$ ) is at a time-dependent equilibrium at any radial ( $r$ ) position inside the IXB. Thus, the system  
316 can be modeled based on the unsteady-state diffusion-adsorption mass balance, prescribed by **Eqn.**  
317 **4**:

$$\frac{\partial}{\partial t} [\varepsilon C + \rho(1 - \varepsilon)q] = \varepsilon D \frac{1}{r^2} \frac{\partial}{\partial r} \left( r^2 \frac{\partial C}{\partial r} \right) \quad (4)$$

318 in which the time change of DAP bulk concentration and adsorbed DAP are balanced by the DAP  
319 diffusion in the spherical coordinate system. In **Eqn. 4**,  $\varepsilon$  denotes the porosity of IXB (0.4),<sup>31</sup>  $\rho$   
320 is the IXB density ( $1.1 \text{ kg m}^{-3}$ ),<sup>25</sup>  $q$  denotes the DAP removal capacity at time  $t$ , and  $D$  denotes the  
321 DAP bulk diffusion coefficient ( $1.96 \times 10^{-10} \text{ m}^2 \text{ s}^{-1}$ ).<sup>26</sup> To solve **Eqn. 4**, fractional coverage ( $\theta$ ),  
322 defined as the ratio of  $q$  at time  $t$  to the equilibrium (maximum) removal capacity ( $q_e$ ). The initial  
323 condition and boundary conditions are listed below.

324 **Initial condition:** At  $t = 0$  and  $r = R$ ,  $C = C_0$  (at the beginning of adsorption, the DAP concentration  
325 on the surface of IXB is equal to the DAP bulk concentration);

326 **Boundary condition 1:**  $\frac{dC(1)}{dt} = \frac{C(1)-C(2)}{(R/m)}$  (time change of bulk DAP concentration is equal to the

327 DAP diffusion from the surface to the center);

328 **Boundary condition 2:**  $C(m) = C(m-1)$  (symmetry at the adsorbent center).

329 Here,  $R$  denotes the IXB particle radius ( $10.2 \pm 2.5 \mu\text{m}$ , measured by SEM image analysis), and  $m$

330 is the number of discretized points in the  $r$  direction (schematized in **Figure 2a**). The relationship

331 between the  $\theta$  and the rate constants of adsorption ( $k_{ads}$ ) and desorption ( $k_{des}$ ) can be expressed as

332 follows:

$$\frac{d\theta}{dt} = k_{ads}(n_0 - \theta)(1 - \theta) - k_{des}\theta \quad (5)$$

$$\theta = \frac{q}{q_e} = \frac{C_0 - C}{m_{ads}q_e} V \quad (6)$$

333 **Eqns. 4-6** with the initial condition and boundary conditions were solved numerically in Matlab

334 (version R2021a) by converting them into  $m$  sets of ordinary differential equations (ODEs)<sup>27</sup> using

335 central finite difference for spatial derivatives (methods of lines, MOL).<sup>28</sup> **Figure 2a** shows the

336 time change of IXB fractional coverage calculated by fitting the experimental data with  $m = 30,000$

337 and adjusting  $k_{ads}$ . The plot of surface coverage versus incubation time with the best fit ( $R^2$ )

338 resulted in  $k_{ads} = 400 \text{ s}^{-1}$ , corresponding to an adsorption time constant ( $1/k_{ads}$ ) of 0.025 s, which

339 proves that the DAP adsorption on IXB is instantaneous. Such a small time constant is in

340 accordance with the DAP SLB formation time scale (<10 s) on negatively charged lipid bilayers,

341 mimicking cell membrane, measured by the quartz crystal microbalance with dissipation,<sup>29</sup> high-  
342 speed atomic force microscopy,<sup>30</sup> and molecular dynamics.<sup>31</sup> Therefore, electrostatically driven  
343 DAP SLB formation on the IXB may be considered as a nearly instantaneous process. Accordingly,  
344 the time (4 h) required to reach the maximum DAP removal capacity is attributed to a diffusion-  
345 controlled process. Diffusion of DAP into the IXB may be a result of contact-mediated  
346 deformation and de-assembly of otherwise self-assembled DAP molecules. ATR-FTIR spectra of  
347 DAP, IXB, and DAP-IXB complex were acquired to confirm the key functional groups involved  
348 in the removal process (**Figure S4**). The peaks at 3280 cm<sup>-1</sup> of DAP<sup>32</sup> and 3022 cm<sup>-1</sup> of IXB  
349 spectra were associated with the O-H stretching of carboxylic acid groups and the C-H stretching  
350 of quaternary ammonium groups, respectively. The shift of C-H stretching peak to 3034 cm<sup>-1</sup> in  
351 the spectrum DAP-IXB complex, and its broadness may be a result of quaternary ammonium  
352 groups-carboxylate groups complex formation. The peak at 3060 cm<sup>-1</sup> of DAP spectrum was  
353 attributed to C-H stretching while the peak at 3357 cm<sup>-1</sup> of IXB spectrum and the peak at 3335 cm<sup>-1</sup>  
354 of DAP-IXB complex spectrum were both attributed to O-H stretching arising from moisture in  
355 the samples.

356 To further examine the effect of diffusion, other IXBs (AC4) with the same chemical structure  
357 as cholestyramine but varying particle diameters were used. The DAP removal capacity at a fixed

358 incubation time of 4 h was measured for large (diameter =  $108.4 \pm 5.1 \mu\text{m}$ ), medium (diameter =  
359  $33.9 \pm 13.9 \mu\text{m}$ ), fine (diameter =  $20.2 \pm 6.0 \mu\text{m}$ ), and very fine (diameter =  $10.0 \pm 4.7 \mu\text{m}$ ) AC4  
360 particles. **Figure 2b** shows the DAP removal capacity of AC4 particles with varying diameters  
361 after 4 h of incubation compared with the cholestyramine IXB. The removal capacity at initial  
362 DAP concentrations higher or lower than CMC decreased by increasing the particle size. To  
363 understand the effect of particle size on DAP removal capacity, theoretical  $q_e$  based on the solution  
364 of **Eqns. 4-6** for each particle size (average, upper limit, and lower limit) was calculated and  
365 compared with the experimental  $q_e$  in **Figure 2c**. The theoretical  $q_e$  decreased by increasing the  
366 particle size, matching the experiments, which supports the diffusion-controlled mechanism of  
367 DAP removal. The upper limit of the particle diameters resulted in the lower theoretical value of  
368  $q_e$ , whereas the lower limit of the particle diameters yielded the upper theoretical value of  $q_e$ . The  
369 SEM images and size distribution of AC4 particles are shown in **Figures 2d-g**. The experimental  
370  $q_e$  attaining values between the lower and average values of model predictions were associated  
371 with the particle diameter distribution skewed from the average to the upper limit of particle  
372 diameters (e.g., for the very fine particles, **Figure 2g**). Together, all of this is consistent with  
373 diffusion-controlled DAP removal.

374

375

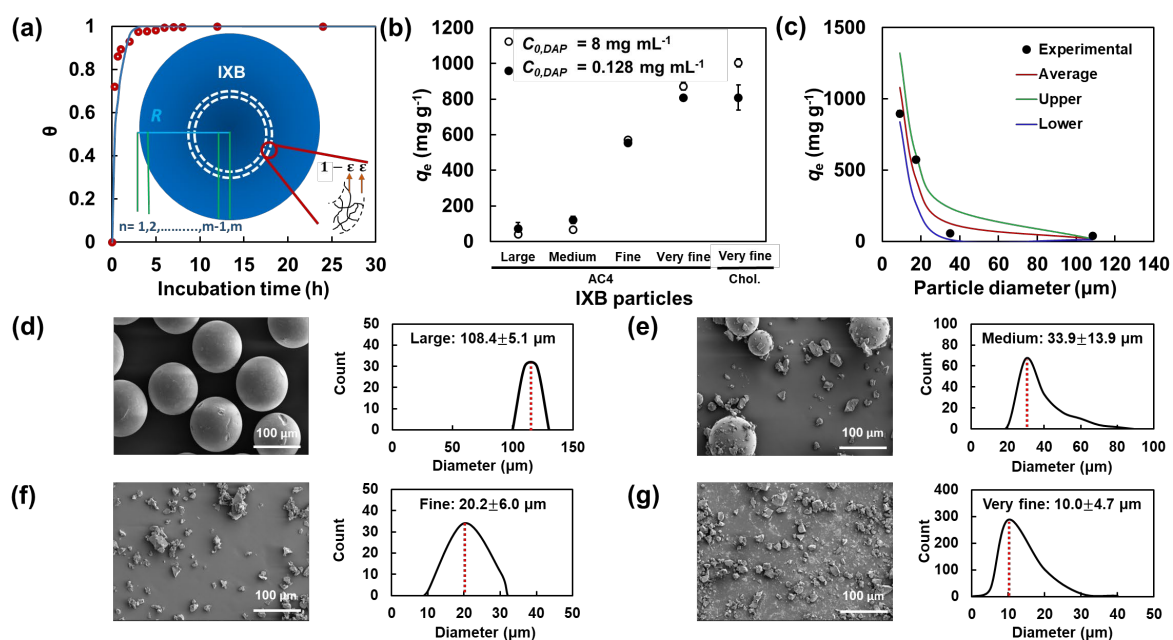

376

377 **Figure 2. Effect of IXB particle size on DAP removal capacity. (a)** Fractional coverage of IXB

378 with DAP ( $8 \text{ mg mL}^{-1}$ ) versus incubation time based on the experimental data and theoretical

379 predictions using **Eqns. 4-6** ( $R^2 = 0.94$ ). **(b)** DAP removal capacity of different sizes of AC4 IXB

380 (incubated for 4 h with a DAP solution, concentration =  $8 \text{ mg mL}^{-1}$ , higher than the CMC, or  $0.128$

381  $\text{mg mL}^{-1}$ , lower than the CMC) compared with the cholestyramine IXB. **(c)** DAP removal capacity

382 of different sizes of AC4 incubated for 4 h with a DAP solution (concentration =  $8 \text{ mg mL}^{-1}$ ) based

383 on the experimental data and theoretical predictions via solving **Eqns. 4-6** ( $R^2 = 0.92$  for the

384 average,  $R^2 = 0.90$  for the lower limit, and  $R^2 = 0.87$  for the upper limit). SEM images and size

385 distribution of AC4 IXB particles, including **(d)** large particles, **(e)** medium particles, **(f)** fine  
386 particles, or **(g)** very fine particles.

387

### 388 **3.3 Effect of initial DAP concentration on the equilibrium DAP removal capacity of IXB**

389 The effect of initial DAP concentration on the equilibrium  $q_e$  of cholestyramine IXB was  
390 studied by incubating the IXB in DAP solutions of 1-20 mg mL<sup>-1</sup> and measuring DAP  
391 concentration in the supernatant after 4 h. **Figure 3a** shows DAP solutions in Milli-Q water with  
392 varying initial concentrations before and after the IXB incubation. The DAP solutions had a  
393 uniform yellow color prior to contacting the IXB, which was more distinguishable at higher  
394 concentrations, and after contacting the IXB, yellow precipitates were observed at the bottom of  
395 the vials. **Figure 3b** presents the DAP removal percentage and capacity of cholestyramine IXB at  
396 varying initial DAP concentrations. The DAP removal percentage was near 100 % when the initial  
397 DAP concentrations were below 8 mg mL<sup>-1</sup>. The stoichiometric ratios of quaternary ammonium  
398 groups of IXB (mol) to carboxylate groups of DAP (mol) range from 1:0.3125 to 1:2.5 at DAP  
399 concentrations ranging from 1 mg mL<sup>-1</sup> to 8 mg mL<sup>-1</sup>. By increasing the initial DAP concentration  
400 beyond 8 mg mL<sup>-1</sup>, DAP removal percentage decreased because the active binding sites of IXB  
401 are saturated. The DAP removal capacity of IXB was increased by increasing the initial DAP  
402 concentration from 1 mg mL<sup>-1</sup> to 12 mg mL<sup>-1</sup> and reached a plateau of ~ 1250 mg g<sup>-1</sup> at higher



403 initial DAP concentrations. The maximum DAP removal capacity is ~200 % higher than the  
404 calculated theoretical value based on the charge stoichiometric ratio (i.e., 1 mmol g<sup>-1</sup> of IXB  
405 ammonium groups adsorbs 1 mmol g<sup>-1</sup> of DAP carboxylate groups, corresponding to 0.25 mmol  
406 g<sup>-1</sup> or 406 mg g<sup>-1</sup> of DAP). The supra-stoichiometric DAP removal may be a result of DAP self-  
407 assembly or SLB formation.

408 To understand the adsorption isotherm, **Figure 3c** presents the equilibrium removal capacity  
409 of IXB at varying equilibrium DAP concentrations (i.e., adsorption isotherm). The removal  
410 capacity increased as equilibrium DAP concentration increased to 2 mg mL<sup>-1</sup>, reaching a plateau  
411 of ~1270 mg g<sup>-1</sup>. The Langmuir isotherm was fitted to the data using **Eqn. 7**<sup>33</sup>:

$$\frac{1}{q_e} = \frac{K}{C_e} + \frac{1}{q_M} \quad (7)$$

412 in which  $q_e$  is the removal capacity (mg g<sup>-1</sup>) at equilibrium,  $q_M$  is the maximum removal capacity  
413 (mg g<sup>-1</sup>), and  $K$  is the adsorption equilibrium constant. Following the Langmuir fitting, the  $q_M$  and  
414  $K$  were ~1270 mg mL<sup>-1</sup> and 0.0002, respectively. Although the experimental data were well fitted  
415 with the Langmuir isotherm ( $R^2 = 0.928$ ), it should be noted that the adsorption may not simply be  
416 a monolayer coverage as a result of DAP self-assembly/SLB formation. The sharp increase of  
417 removal capacity at equilibrium DAP concentrations lower than 2 mg mL<sup>-1</sup> may be associated with

418 the formation of hemimicelles (monolayer adsorption) or admicelles (bilayer adsorption) due to  
 419 the electrostatic interaction between DAP with the IXB.

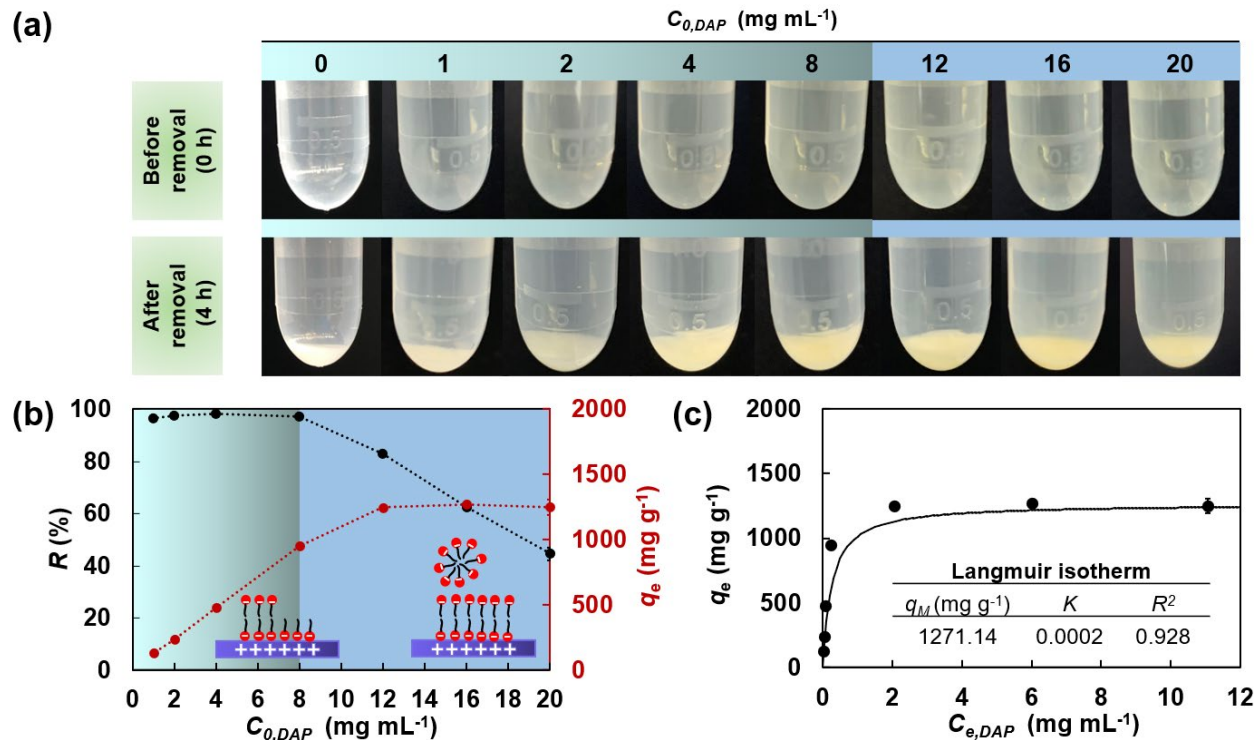

420  
 421 **Figure 3. IXB-mediated DAP equilibrium adsorption.** (a) Photos of DAP solutions with varying  
 422 DAP concentrations before and after contact with the cholestyramine IXB. (b) Effect of initial  
 423 DAP concentrations on the removal percentage ( $R$ ) and capacity ( $q_e$ ) of IXB after 4 h of incubation.  
 424 (c) DAP removal capacity of IXB versus equilibrium DAP concentrations fitted with the Langmuir  
 425 isotherm model. The isotherm parameters are summarized in the inset table.

426  
 427  
 428  
 429

### 430 **3.4 Effects of pH and ionic strength on IXB-DAP interactions**

431 To investigate the effect of electrostatic interactions on the cholestyramine IXB-mediated  
432 DAP adsorption, pH and ionic strength were systematically altered. **Figure 4a** shows the chemical  
433 structure of DAP, the pK<sub>a</sub> values of its major functional groups, and its net charge based on  
434 ionization states at varying pH.<sup>34</sup> At pH ranging from 5 to 12 wherein the net charge of DAP is  
435 around -4, the DAP removal capacity of IXB remained around 1000 mg g<sup>-1</sup>. Decreasing the pH  
436 from 5 to 1.5 decreased the removal capacity. At pH < 5, the carboxyl groups become partially  
437 protonated, reducing the number of anionic binding sites of DAP that would otherwise interact  
438 with the cationic IXB. These findings imply that the DAP adsorption to IXB is regulated by  
439 electrostatic attraction. **Figure 4c** shows the ζ-potential of DAP at varying pH. At pH = 1.5, the ζ-  
440 potential of DAP was positive; however, a DAP removal capacity of 500 mg g<sup>-1</sup> was still obtained  
441 (**Figure 4b**). This may be explained by discussing three possibilities: (i) although DAP bears a net  
442 positive charge, there are still some local negative charges on it, interacting with the positively  
443 charged quaternary ammonium groups of IXB; (ii) The equilibrium adsorption reactions (rxn.) for  
444 DAP-IXB is explained as follows:

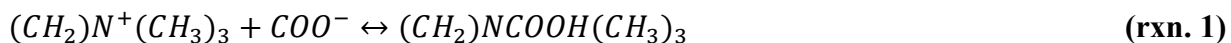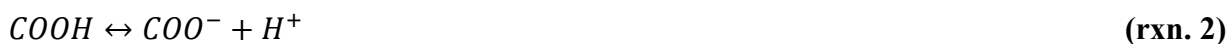

445 Based on the Le Chatelier's principle,<sup>35</sup> at low pH (i.e., 1.5), the high proton concentration may  
446 shift rxn. 2 to the left; however, the high quaternary ammonium concentration of IXB (8 mM) shifts  
447 rxn. 1 to the right, reducing the COO<sup>-</sup> concentration, which in turn shifts rxn. 2 to the right.  
448 Therefore, the concentration of deprotonated carboxylate groups may be higher than the theoretical  
449 calculation; (iii) DAP may further aggregate and phase separate at highly acidic conditions. To  
450 investigate this, DAP hydrodynamic size at varying pH were measured using DLS, as shown in  
451 **Figure 4d**. Decreasing the pH increased the DAP hydrodynamic size from ~ 200 nm at pH = 6.5  
452 to ~900 nm at pH=1.5, attesting to DAP aggregation in acidic media. **Figure 4e** shows the  
453 precipitation-mediated removal percentage of DAP (8 mg mL<sup>-1</sup>) at varying pH without IXB. The  
454 removal percentage at pH = 1.5 indicates that 30 % of DAP is precipitated out in the absence of  
455 IXB. Therefore, the removal capacity at pH = 1.5 is attributed to the DAP self-aggregation and  
456 phase separation.

457

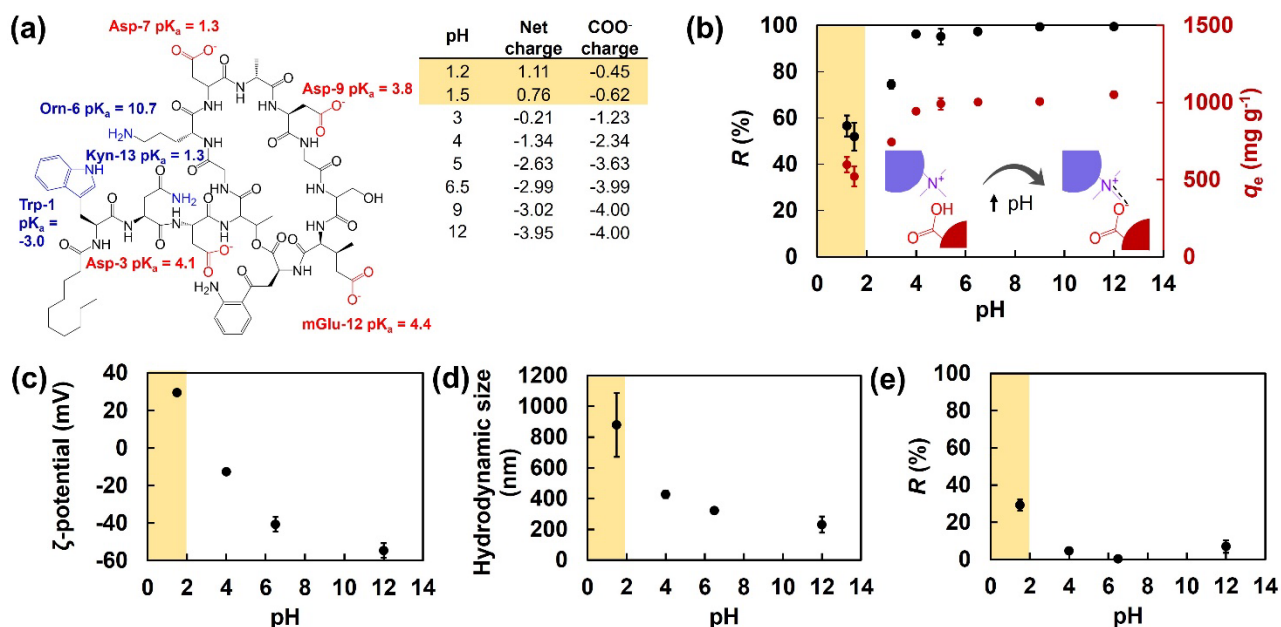

458

459 **Figure 4. Effect of pH on IXB-mediated DAP adsorption. (a)** Chemical structure of DAP, the

460 pKa values of its major functional groups, and its carboxylate and net charge at varying pH. **(b)**

461 IXB-mediated DAP ( $8 \text{ mg mL}^{-1}$ ) removal percentage ( $R$ ) and capacity ( $q_e$ ) at varying pH. **(c)**  $\zeta$ -

462 potential and **(d)** hydrodynamic size of DAP at varying pH. **(e)** Removal percentage ( $R$ ) of DAP

463 ( $8 \text{ mg mL}^{-1}$ ) at varying pH in the absence of IXB. Highlighted pH in yellow indicates a net DAP

464 positive charge and the precipitation of DAP.

465

466 The DAP removal percentage and capacity of IXB in different electrolytes, containing mono-

467 or divalent ions were investigated. **Figure 5a** shows the  $R$  and  $q_e$  for IXB-mediated DAP removal

468 at varying sodium ion ( $\text{Na}^+$ ) concentrations. The DAP removal capacity remained almost

469 unchanged, around  $1000 \text{ mg g}^{-1}$ , when the  $\text{Na}^+$  concentration increased from 0 mM to 100 mM. At  
470 supraphysiological concentrations of  $\text{Na}^+$ , i.e., 200 - 500 mM, the DAP removal percentage and  
471 capacity decreased by only  $\sim 10\%$  and  $\sim 20\%$ , respectively. **Figure 5b** and **Figure 5c** show the  $\zeta$ -  
472 potential and hydrodynamic size of DAP at varying  $\text{Na}^+$  concentrations, respectively. Both  $\zeta$ -  
473 potential and hydrodynamic size did not change significantly in the presence of  $\text{Na}^+$ . This is likely  
474 a result of the DAP charge screening by  $\text{Na}^+$  via decreasing the electrical double layer thickness  
475 without comprising the surface charge of DAP.<sup>36</sup>

476 **Figure 5d** shows the IXB-mediated DAP removal percentage and capacity at varying calcium  
477 ion ( $\text{Ca}^{2+}$ ) concentrations. The DAP removal capacity decreased more than 50 % when the  $\text{Ca}^{2+}$   
478 concentration increased from 0 mM to 500 mM, possibly because the divalent ions neutralized the  
479 charge ( $\text{Ca}^{2+}:\text{COO}^- = 1 \text{ mol} : 2 \text{ mol}$ ).<sup>44</sup> **Figure 5e** and **Figure 5f** show the  $\zeta$ -potential and  
480 hydrodynamic size of DAP at varying  $\text{Ca}^{2+}$  concentrations. The  $\zeta$ -potential of DAP significantly  
481 changed from  $\sim -36 \text{ mV}$  in Milli-Q water to  $\sim -10 \text{ mV}$  and  $\sim -3 \text{ mV}$  at 100 and 500 mM of  $\text{Ca}^{2+}$ ,  
482 respectively. The hydrodynamic size of DAP significantly increased from  $\sim 265 \text{ nm}$  in Milli-Q  
483 water to  $\sim 563 \text{ nm}$  in the aqueous medium containing 500 mM of  $\text{Ca}^{2+}$ . These results show that  
484  $\text{Ca}^{2+}$  neutralizes the carboxylate groups of DAP, inducing colloidal aggregation. The effect of  $\text{Na}^+$   
485 and  $\text{Ca}^{2+}$  concentrations on DAP removal in the absence of IXB was also examined (**Figures S5a**

486 and **S5b**). The DAP removal percentage at 500 mM of Na<sup>+</sup> concentration without IXB was ~ 2%,  
487 while it was ~ 10% at 500 mM of Ca<sup>2+</sup>. Accordingly, the majority of DAP removal at high ionic  
488 strength is based on the IXB adsorption, and not the DAP precipitation. The pH and ionic strength  
489 studies imply that the carboxylate groups of DAP were either protonated or neutralized at low pH  
490 or high Ca<sup>2+</sup> concentrations, decreasing the DAP removal efficacy due to the partial loss of  
491 electrostatic interactions. Interestingly, even at such harsh pH or ionic strength conditions,  
492 hydrophobic interactions between DAP resulted into phase separation and DAP removal.

493

494

495

496

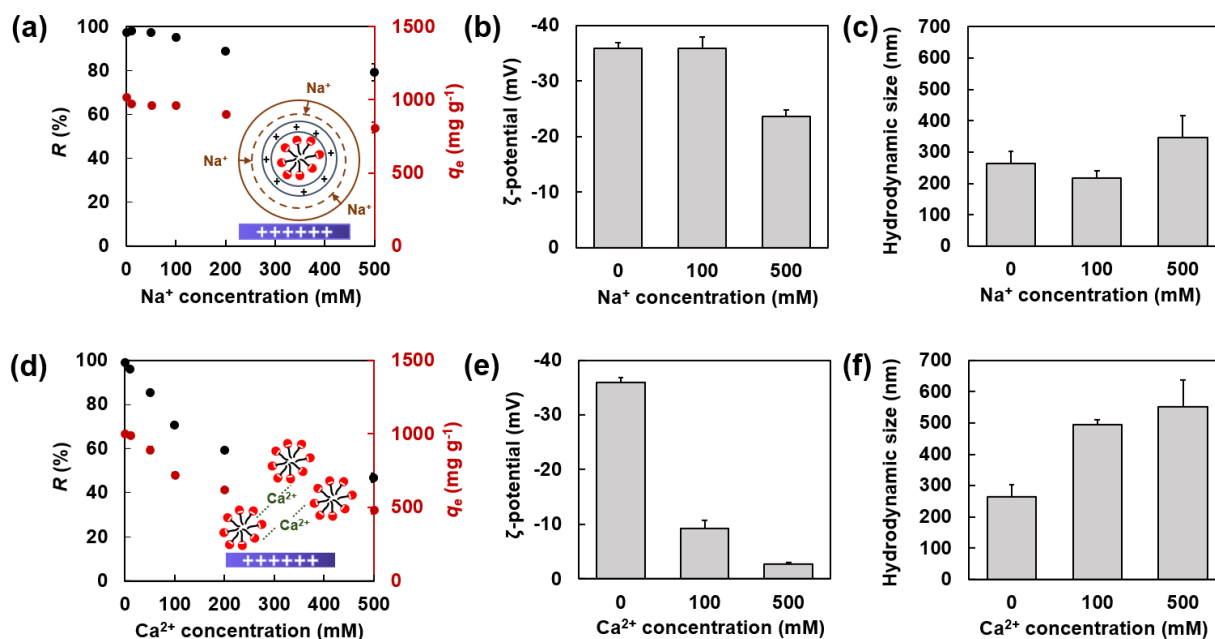

497

498 **Figure 5. Effects of ionic strength and ion types on IXB-mediated DAP adsorption. (a)** IXB-

499 mediated DAP ( $8 \text{ mg mL}^{-1}$ ) removal percentage ( $R$ ) and capacity ( $q_e$ ) at varying  $\text{Na}^+$  concentrations.

500 The inset shows the  $\text{Na}^+$ -mediated shrinkage of electrical double layer of DAP. **(b)**  $\zeta$ -potential and

501 **(c)** hydrodynamic size of DAP at varying  $\text{Na}^+$  concentrations. **(d)** IXB-mediated DAP ( $8 \text{ mg mL}^{-1}$ )

502 <sup>1</sup>) removal percentage and capacity at varying  $\text{Ca}^{2+}$  concentrations. The inset shows the  $\text{Ca}^{2+}$ -

503 mediated DAP neutralization and aggregation. **(e)**  $\zeta$ -potential and **(f)** hydrodynamic size of DAP

504 at varying  $\text{Ca}^{2+}$  concentrations.

505

506

507

508



### 509 **3.5 Effects of SIF components on IXB-mediated DAP removal**

510 Intestinal fluid contains several types of molecules, such as lipids and bile salts, that may  
511 interact with the IXB and affect its DAP removal efficacy. Here, we study the individual effect of  
512 SIF components *in vitro* to uncover the competitive DAP removal capability of cholestyramine  
513 IXB. Lecithin (PC), one of the zwitterionic phospholipids and also one of the main components of  
514 the SIF, is expected to affect the IXB-DAP interactions because the amphiphilic nature of PC may  
515 induce additional hydrophobic interactions with DAP without compromising IXB-DAP  
516 electrostatic interactions.<sup>38</sup> PC is also a widespread constituent of the membranes of living cells,<sup>39</sup>  
517 therefore the interactions between DAP and PC would be the biomimetic route of the DAP  
518 interactions with cell membrane lipid bilayers.<sup>40,41</sup> **Figure 6a** shows the DAP removal percentage  
519 and capacity of IXB at varying PC concentrations ranging from 0.5 mM to 4 mM (physiological  
520 concentration range from FaSSIF to FeSSIF). Increasing the concentration of PC slightly increases  
521 the DAP removal percentage and capacity of IXB, and at 4 mM of PC, a 10% enhancement in the  
522 removal capacity was obtained. **Figures 6b** and **6c** show the  $\zeta$ -potential and hydrodynamic size of  
523 DAP, PC and DAP-PC complex, respectively, at pH  $\sim$  6.5. Similar to DAP, the  $\zeta$ -potential of PC  
524 was negative ( $\sim$  -28 mV) at pH = 6.5, therefore the PC-mediated enhanced DAP removal may not  
525 be significantly affected by electrostatic interactions as the anionic PC and DAP compete with  
526 each other for the cationic IXB. The hydrodynamic size of PC was  $\sim$  800 nm while, after the

527 addition of PC to DAP, it reached ~ 8000 nm, possibly as a result of hydrophobic interactions.  
528 Therefore, the enhanced DAP removal capacity of IXB in the presence of PC (~ 10 %, **Figure 6a**)  
529 may be attributed to the DAP-PC assembly, increasing the number of DAP molecules adsorbed  
530 per active site of IXB.

531 The DAP removal capacity of IXB was investigated at varying bile acid and maleic acid  
532 concentrations. Since IXB has been widely used for sequestering bile acid,<sup>42,43</sup> competitive binding  
533 of IXB with bile acid and DAP was expected. **Figure 6d** shows the effect of IXB-mediated DAP  
534 removal percentage and capacity at varying bile acid concentrations ranging from 3 mM to 12 mM  
535 (physiological concentration range from FaSSIF to FeSSIF). Increasing the concentration of bile  
536 acid from 0 to 3 mM does not have any significant effect on the DAP removal, and at higher bile  
537 acid concentration, the removal capacity slightly decreases. Despite an equal  $\text{SO}_3^- : \text{COO}^-$  molar  
538 ratio of the bile acid : DAP (at ~ 12 mM of bile acid), the DAP removal capacity reduced by less  
539 than 10 %. Theoretically, the DAP removal capacity should reduce ~ 25 % if the electrostatic  
540 interactions of bile acid-IXB ( $\text{SO}_3^- - (\text{CH}_2)\text{N}^+(\text{CH}_3)_3$ ) were the same as the DAP-IXB ( $\text{COO}^- -$   
541  $(\text{CH}_2)\text{N}^+(\text{CH}_3)_3$ ). The bile acid removal capacity of IXB is around  $55 \text{ mg g}^{-1}$ ,<sup>44</sup> which is in  
542 consistence with the reduction on DAP removal capacity, as presented in **Figure 6d**. The effect of  
543 bile acid on the  $\zeta$ -potential and hydrodynamic size of DAP in the absence of IXB are shown in  
544 **Figures S6a** and **S6b**, respectively. The  $\zeta$ -potential and hydrodynamic size of DAP at varying

545 concentrations of bile acid remained almost unchanged, attesting to no significant interactions  
546 between them. Self-assembly of bile acid <sup>45</sup> also resulted in a hydrodynamic size ~ 300 nm. **Figure**  
547 **6e** shows the effect of IXB-mediated DAP removal capacity at varying maleic acid concentrations  
548 ranging from 5 mM to 100 mM (physiological maleic acid concentration in SIF is ~ 20 mM).  
549 When the molar ratio of maleic acid carboxylate groups to the DAP carboxylate groups was  
550 identical (at ~10 mM of maleic acid), the DAP removal capacity of IXB reduced ~ 7 % compared  
551 with the DAP removal capacity of IXB in the absence of maleic acid. This 7 % reduction on the  
552 DAP removal capacity was found in **Figure 6e** in the presence of 10 mM maleic acid.

553

554

555

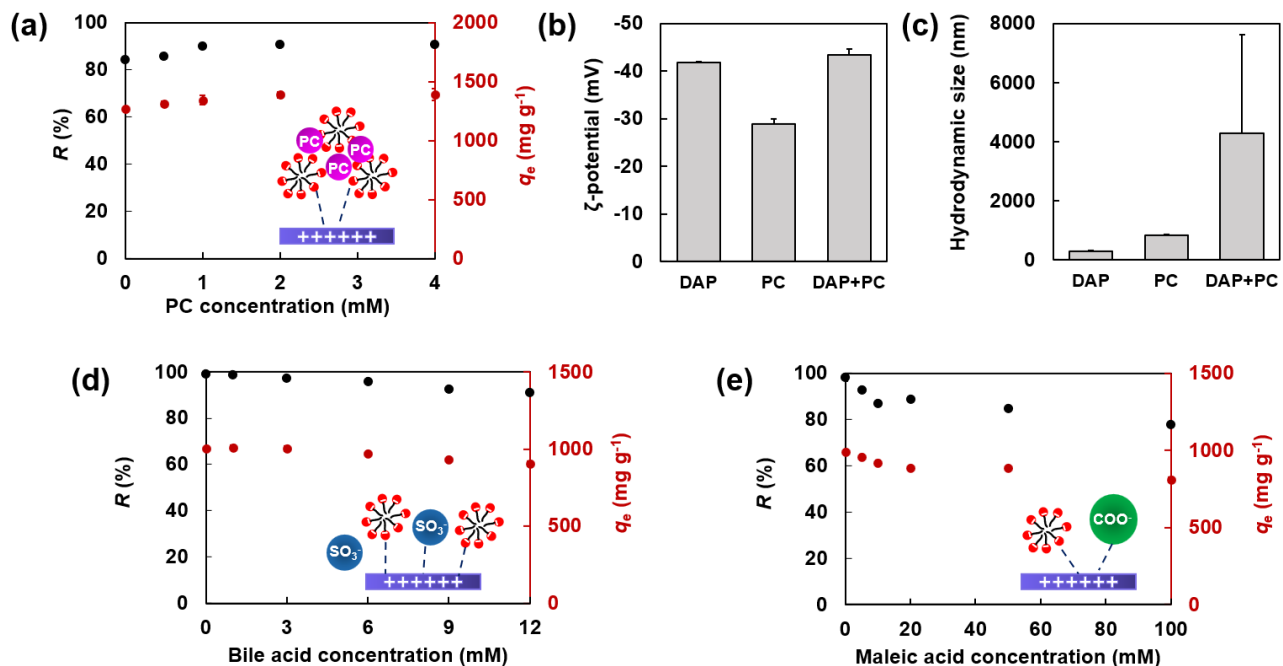

556

557 **Figure 6. Effects of intestinal fluid components on IXB-mediated DAP adsorption. (a) DAP**

558 removal percentage ( $R$ ) and capacity ( $q_e$ ) of IXB at varying PC concentrations (initial DAP

559 concentration =  $12 \text{ mg mL}^{-1}$ ). (b)  $\zeta$ -potential and (c) hydrodynamic size of DAP, PC, and DAP-PC

560 complex. DAP removal percentage and capacity of IXB at varying (d) bile acid concentrations or

561 (e) maleic acid concentrations. The insets in panels a, d, and e show the possible interactions

562 among the SIF component, DAP, and IXB. pH was adjusted to 6.5 using NaOH solution in all

563 the measurements.

564

565

566

567

568

### 569 **3.6 Effect of fasted state and fed state SIF on IXB-mediated DAP removal**

570 The kinetics of IXB-mediated DAP removal in FaSSIF (**Figure S7a**) and FeSSIF (**Figure**  
571 **S7b**) showed that the removal capacity still reached an equilibrium in 4 h, similar to the removal  
572 in Milli-Q water. **Figure 7a** shows the DAP removal percentage of IXB at varying initial DAP  
573 concentrations in the FaSSIF or FeSSIF. The removal percentage was 100 % when the initial DAP  
574 concentration was at 1 mg mL<sup>-1</sup> in both fluids; however, at initial DAP concentrations higher than  
575 2 mg mL<sup>-1</sup>, the percentage of DAP removal in the FeSSIF was always lower than in the FaSSIF.  
576 The DAP removal capacity of IXB at varying initial DAP concentrations in the FaSSIF and FeSSIF  
577 is presented in **Figure 7b**. The maximum removal capacities in FaSSIF (~ 1500 mg g<sup>-1</sup>) and  
578 FeSSIF (~ 1350 mg g<sup>-1</sup>) were higher than in Milli-Q water (~ 1270 mg g<sup>-1</sup>), which is possibly a  
579 result of the additional hydrophobic interactions induced by PC. The lower DAP removal capacity  
580 in the FeSSIF compared with the FaSSIF may be explained by the higher bile acid concentration  
581 of FeSSIF,<sup>17</sup> resulting in more competitive adsorption.

582

583

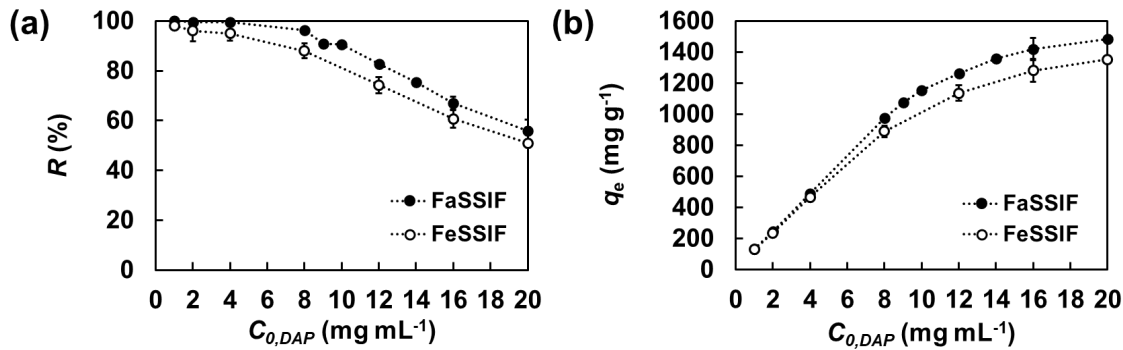

584

585 **Figure 7. IXB-mediated DAP removal in the SIF. DAP removal (a) percentage ( $R$ ) or (b)**

586 **capacity ( $q_e$ ) of IXB at varying initial DAP concentrations in the FaSSIF or FeSSIF.**

587

### 588 3.7 Antibiotic activity of non-captured DAP

589 To understand the DAP bioactivity after IXB-mediated adsorption in physiological DAP

590 concentrations, its antimicrobial activity against *VREfm* at concentrations ranging from 0.25 to 16

591  $\mu\text{g mL}^{-1}$  was studied in broth microdilution. **Figure 8a** presents the bacterial densities ( $\text{OD}_{600}$ )

592 following growth in the presence of supernatant collected from DAP with the cholestyramine IXB

593 at different incubation times. The available antibiotic against *VREfm* reduced with increasing

594 incubation time in the presence of IXB, resulting in an increase in the bacterial density. This is

595 consistent with the time-dependent DAP removal data (**Figure 1c,d**). **Figure 8b** presents the

596 bacterial density following growth in the presence of supernatant collected from DAP with varying

597 size of AC4 IXB. The available antibiotic against *VREfm* was reduced by decreasing the IXB size.

598 The time-dependent and size-dependent DAP removal by IXB in physiological DAP  
599 concentrations followed the DAP removal by IXB when initial DAP concentration was higher than  
600 CMC, which prove the diffusion-controlled mechanism of DAP removal by IXB.  
601

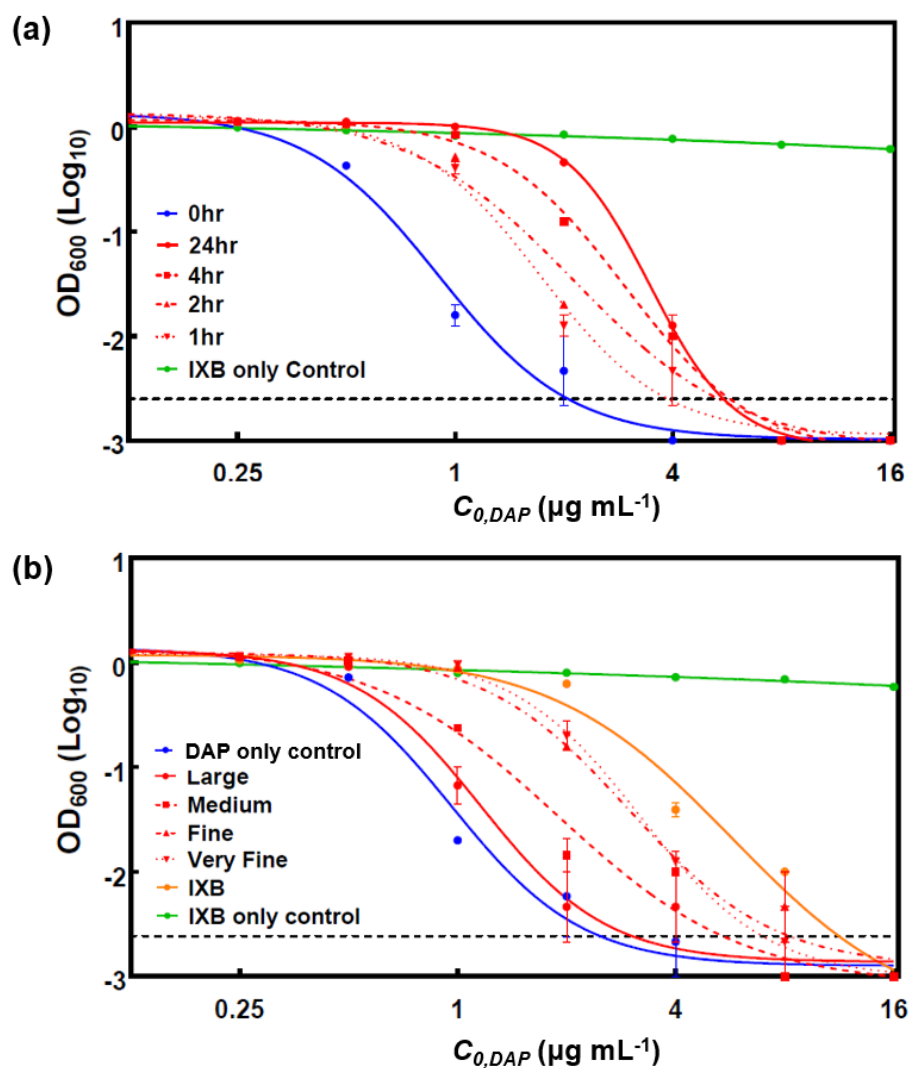

602  
603 **Figure 8.** Bacterial densities (OD<sub>600</sub>) for (a) DAP with cholestyramine IXB at different incubation  
604 time and (b) DAP with AC4 IXB with different particle sizes.

#### 605 4. Conclusions

606 Antibiotics, such as DAP, which enter the gut through biliary excretion, can drive resistance in the  
607 opportunistic bacteria in GI tract without therapeutic gain. We previously demonstrated that the  
608 oral administration of cholestyramine IXB concurrent with systemic DAP treatment very  
609 substantially prevented the up selection and shedding of DAP resistant *VREfm*.<sup>8,9</sup> In this study, we  
610 shed light on the mechanism and engineering aspects of IXB-mediated DAP removal. DAP tends  
611 to self-assemble into micelles or aggregates in aqueous solutions and re-assemble to form SLBs  
612 upon contacting the IXB, which triggers the time-dependent molecular diffusion of DAP inside  
613 the IXB pores. The smaller the IXB particle size, the more efficient the DAP removal. As a result  
614 of DAP self-assembly, a supra-stoichiometric IXB-mediated DAP removal was obtained. The  
615 DAP adsorption by IXB is mainly regulated by electrostatic interactions. DAP undergoes charge  
616 neutralization and partial precipitation at a high  $\text{Ca}^{2+}$  concentration or low pH, which weakens its  
617 electrostatic binding to the IXB. Zwitterionic phospholipid molecules (e.g., PC) enhanced the  
618 removal capacity of IXB, likely because of hydrophobically-induced DAP-PC aggregate  
619 formation, without compromising the electric charges of DAP. Bile acid and maleic acid resulted  
620 in some competitive adsorption for DAP but did not significantly disturb the IXB-DAP interactions.  
621 The DAP removal efficacy of IXB in the FaSSIF was slightly higher than in the FeSSIF as a result  
622 of lower bile acid concentration. This work lays the foundations for optimizing the use of ion



623 exchange sorbents, such as cholestyramine, as adjuvant therapy to prevent daptomycin resistance,  
624 as well as designing next generation biomaterials that could combat the emergence of antimicrobial  
625 resistance in the GI tract.

626

## 627 **ASSOCIATED CONTENT**

### 628 **Supporting Information**

629 Calibration lines of DAP UV-vis absorbance at 364 nm; Linear regression analysis of calibration  
630 line for DAP in milli-Q water obtained by HPLC; Optical microscope image of cholestyramine  
631 IXB; ATR-FTIR spectra of DAP, IXB, and DAP-IXB complex; DAP removal percentage at  
632 varying Na<sup>+</sup> and Ca<sup>2+</sup> concentrations without using the IXB; ζ-potential and hydrodynamic size of  
633 DAP at varying bile acid concentrations; Kinetics of DAP removal by IXB in FaSSIF or FeSSIF.

634

## 635 **AUTHOR INFORMATION**

### 636 **Corresponding Author**

637 Amir Sheikhi – Department of Chemical Engineering and Department of Biomedical  
638 Engineering, The Pennsylvania State University, University Park, PA 16802; Email:

639 [sheikhi@psu.edu](mailto:sheikhi@psu.edu)

640 **Acknowledgements**

641 We thank J. Stapleton (Materials Research Institute, Penn State) for connecting us all, A.  
642 Zydney for access to his DLS instrument, and the Huck CSL Behring Fermentation Facility for  
643 use of the HPLC instrument and A. Sathish for operating it. This work was funded by Penn State  
644 (AR, AS) and the Patricia and Stephen Benkovic Research Initiative (AS). Funding from N.  
645 Deighton (Huck Institutes of the Life Sciences) made it possible to obtain Figure 1b on the Cryo-  
646 EM and Figures 1d and 2b on the HPLC.

647

648 **References**

- 649 (1) Woodworth, J. R.; Nyhart, E. H.; Brier, G. L.; Wolny, J. D.; Black, H. R. Single-Dose  
650 Pharmacokinetics and Antibacterial Activity of Daptomycin. *Antimicrobial Agents and*  
651 *Chemotherapy* **1992**, *36* (2), 318–325. <https://doi.org/10.1128/aac.36.2.318>.
- 652 (2) Markwart, R.; Willrich, N.; Eckmanns, T.; Werner, G.; Ayobami, O. Low Proportion of  
653 Linezolid and Daptomycin Resistance Among Bloodborne Vancomycin-Resistant  
654 Enterococcus Faecium and Methicillin-Resistant Staphylococcus Aureus Infections in  
655 Europe. *Front Microbiol* **2021**, *12*, 664199. <https://doi.org/10.3389/fmicb.2021.664199>.

- 656 (3) Mercuro, N. Combatting Resistant Enterococcal Infections: A Pharmacotherapy Review.  
657 *Expert Opinion on Pharmacotherapy* **2018**, *19* (9), 979–992.  
658 <https://doi.org/10.1080/14656566.2018.1479397>
- 659 (4) Barnes, A. M. T.; Dale, J. L.; Chen, Y.; Manias, D. A.; Greenwood Quaintance, K. E.; Karau,  
660 M. K.; Kashyap, P. C.; Patel, R.; Wells, C. L.; Dunny, G. M. Enterococcus Faecalis Readily  
661 Colonizes the Entire Gastrointestinal Tract and Forms Biofilms in a Germ-Free Mouse  
662 Model. *Virulence* **2017**, *8* (3), 282–296. <https://doi.org/10.1080/21505594.2016.1208890>.
- 663 (5) Alevizakos, M.; Gaitanidis, A.; Nasioudis, D.; Tori, K.; Flokas, M. E.; Mylonakis, E.  
664 Colonization with Vancomycin-Resistant Enterococci and Risk for Bloodstream Infection  
665 among Patients with Malignancy: A Systematic Review and Meta-Analysis. *Open Forum*  
666 *Infectious Diseases*. Oxford University Press January 1, 2017.  
667 <https://doi.org/10.1093/ofid/ofw246>.
- 668 (6) Garcia-Solache, M.; Rice, L. B. The Enterococcus: A Model of Adaptability to Its  
669 Environment. *Clin Microbiol Rev* **2019**, *32* (2). <https://doi.org/10.1128/CMR.00058-18>.
- 670 (7) Kinnear, C. L.; Hansen, E.; Morley, V. J.; Tracy, K. C.; Forstchen, M.; Read, A. F.; Woods,  
671 R. J. Daptomycin Treatment Impacts Resistance in Off-Target Populations of Vancomycin-  
672 Resistant Enterococcus Faecium. *PLoS Biol* **2020**, *18* (12), e3000987.  
673 <https://doi.org/10.1371/journal.pbio.3000987>.

- 674 (8) Morley, V. J.; Sim, D. G.; Penkevich, A.; Woods, R. J. Oral Cholestyramine Prevents  
675 Enrichment of Diverse Daptomycin-Resistance 1 Mutations in Intestinal *Enterococcus*  
676 *Faecium* 2 3. *bioRxiv* **2022**. <https://doi.org/10.1101/2022.05.25.493495>.
- 677 (9) Morley, V. J.; Kinnear, C. L.; Sim, D. G.; Olson, S. N.; Jackson, L. M.; Hansen, E.; Usher,  
678 G. A.; Showalter, S. A.; Pai, M. P.; Woods, R. J.; Read, A. F. An Adjunctive Therapy  
679 Administered with an Antibiotic Prevents Enrichment of Antibiotic-Resistant Clones of a  
680 Colonizing Opportunistic Pathogen. *Elife* **2020**, *9*. <https://doi.org/10.7554/eLife.58147>.
- 681 (10) Chaudhari, S. N.; McCurry, M. D.; Devlin, A. S. Chains of Evidence from Correlations to  
682 Causal Molecules in Microbiome-Linked Diseases. *Nature Chemical Biology*. Nature  
683 Research October 1, 2021, pp 1046–1056. <https://doi.org/10.1038/s41589-021-00861-z>.
- 684 (11) Heidary, M.; Khosravi, A. D.; Khoshnood, S.; Nasiri, M. J.; Soleimani, S.; Goudarzi, M.  
685 Daptomycin. *J Antimicrob Chemother* **2018**, *73* (1), 1–11.  
686 <https://doi.org/10.1093/jac/dkx349>.
- 687 (12) Ye, Y.; Xia, Z.; Zhang, D.; Sheng, Z.; Zhang, P.; Zhu, H.; Xu, N.; Liang, S. Multifunctional  
688 Pharmaceutical Effects of the Antibiotic Daptomycin. *Biomed Res Int* **2019**, *2019*, 8609218.  
689 <https://doi.org/10.1155/2019/8609218>.

- 690 (13) Miller, W. R.; Bayer, A. S.; Arias, C. A. Mechanism of Action and Resistance to  
691 Daptomycin in *Staphylococcus Aureus* and Enterococci. *Cold Spring Harb Perspect Med*  
692 **2016**, *6* (11). <https://doi.org/10.1101/cshperspect.a026997>.
- 693 (14) Hobbs, J. K.; Miller, K.; O'Neill, A. J.; Chopra, I. Consequences of Daptomycin-Mediated  
694 Membrane Damage in *Staphylococcus Aureus*. *J Antimicrob Chemother* **2008**, *62* (5),  
695 1003–1008. <https://doi.org/10.1093/jac/dkn321>.
- 696 (15) Ho, S. W.; Jung, D.; Calhoun, J. R.; Lear, J. D.; Okon, M.; Scott, W. R.; Hancock, R. E.;  
697 Straus, S. K. Effect of Divalent Cations on the Structure of the Antibiotic Daptomycin. *Eur*  
698 *Biophys J* **2008**, *37* (4), 421–433. <https://doi.org/10.1007/s00249-007-0227-2>.
- 699 (16) Collins, T. J. ImageJ for Microscopy. *Biotechniques* **2007**, *43* (1S), S25–S30.  
700 <https://doi.org/10.2144/000112517>.
- 701 (17) Klein, S. The Use of Biorelevant Dissolution Media to Forecast the in Vivo Performance of  
702 a Drug. *AAPS J* **2010**, *12* (3), 397–406. <https://doi.org/10.1208/s12248-010-9203-3>.
- 703 (18) Hofmann, A. F.; Small, D. M. Detergent Properties of Bile Salts. *Annu Rev Med*  
704 *1967*; *18*:333-76. <https://doi.org/10.1146/annurev.me.18.020167.002001>.
- 705 (19) Muraih, J. K.; Pearson, A.; Silverman, J.; Palmer, M. Oligomerization of Daptomycin on  
706 Membranes. *Biochimica et Biophysica Acta - Biomembranes* **2011**, *1808* (4), 1154–1160.  
707 <https://doi.org/10.1016/j.bbamem.2011.01.001>.

- 708 (20) Kaszuba, M.; Corbett, J.; Watson, F. M. N.; Jones, A. High-Concentration Zeta Potential  
709 Measurements Using Light-Scattering Techniques. In *Philosophical Transactions of the*  
710 *Royal Society A: Mathematical, Physical and Engineering Sciences*; Royal Society, 2010;  
711 Vol. 368, pp 4439–4451. <https://doi.org/10.1098/rsta.2010.0175>.
- 712 (21) Weinstein, M. P.; Clinical and Laboratory Standards Institute. *Performance Standards for*  
713 *Antimicrobial Susceptibility Testing*.
- 714 (22) Kirkham, S.; Castelletto, V.; Hamley, I. W.; Inoue, K.; Rambo, R.; Reza, M.; Ruokolainen,  
715 J. Self-Assembly of the Cyclic Lipopeptide Daptomycin: Spherical Micelle Formation Does  
716 Not Depend on the Presence of Calcium Chloride. *Chemphyschem* **2016**, *17* (14), 2118–  
717 2122. <https://doi.org/10.1002/cphc.201600308>.
- 718 (23) Brian, A. A.; McConnell, H. M. Allogeneic Stimulation of Cytotoxic T Cells by Supported  
719 Planar Membranes (Class I Major Histocompatibility Antigen/Membrane  
720 Reconstitution/Antigen Processing/LFA-1 Cell Surface Protein/Lateral Diffusion); *PNAS*  
721 1984; Vol. 81. <https://doi.org/10.1073/pnas.81.19.6159>
- 722 (24) Richter, R. P.; Bérat, R.; Brisson, A. R. Formation of Solid-Supported Lipid Bilayers: An  
723 Integrated View. *Langmuir* **2006**, *22* (8), 3497–3505. <https://doi.org/10.1021/la052687c>.

- 724 (25) R De Simone, New Microporous Cholestyramine Analog for Treatment of  
725 Hypercholesterolemia. *J Pharm Sci.* 1978 Dec;67(12):1695-8.  
726 <https://doi.org/10.1002/jps.2600671216>.
- 727 (26) Stewart, P. S.; Davison, W. M.; Steenbergen, J. N. Daptomycin Rapidly Penetrates a  
728 Staphylococcus Epidermidis Biofilm. *Antimicrobial Agents and Chemotherapy* **2009**, *53*  
729 (8), 3505–3507. <https://doi.org/10.1128/AAC.01728-08>.
- 730 (27) Tauk, L.; Schröder, A. P.; Decher, G.; Giuseppone, N. Hierarchical Functional Gradients of  
731 PH-Responsive Self-Assembled Monolayers Using Dynamic Covalent Chemistry on  
732 Surfaces. *Nature Chemistry* **2009**, *1* (8), 649–656. <https://doi.org/10.1038/nchem.400>.
- 733 (28) M. Hanif Chaudhry, Open-Channel Flow Second Edition.
- 734 (29) Juhanieicz-Debinska, J.; Dziubak, D.; Sek, S. Physicochemical Characterization of  
735 Daptomycin Interaction with Negatively Charged Lipid Membranes. *Langmuir* **2020**, *36*  
736 (19), 5324–5335. <https://doi.org/10.1021/acs.langmuir.0c00716>.
- 737 (30) Zuttion, F.; Colom, A.; Matile, S.; Farago, D.; Pompeo, F.; Kokavecz, J.; Galinier, A.;  
738 Sturgis, J.; Casuso, I. High-Speed Atomic Force Microscopy Highlights New Molecular  
739 Mechanism of Daptomycin Action. *Nature Communications* **2020**, *11* (1).  
740 <https://doi.org/10.1038/s41467-020-19710-z>.

- 741 (31) Liu, B.; Karttunen, M. Lipopeptide Daptomycin: Interactions with Bacterial and  
742 Phospholipid Membranes, Stability of Membrane Aggregates and Micellation in Solution.  
743 *Biochim Biophys Acta Biomembr* **2018**, *1860* (9), 1949–1954.  
744 <https://doi.org/10.1016/j.bbamem.2018.03.028>.
- 745 (32) Tótolí, E. G.; Salgado, H. R. N. Fourier-Transform Infrared (FTIR) Spectrophotometry: An  
746 Ecofriendly Method for the Analysis of Injectable Daptomycin. *J AOAC Int* **2017**, *100* (5),  
747 1569–1576. <https://doi.org/10.5740/jaoacint.17-0067>.
- 748 (33) Langmuir, I. The Adsorption of Gases on Plane Surfaces of Glass, Mica and Platinum. *J*  
749 *Am Chem Soc* **1918**, *40*, 1361–1403. <https://doi.org/10.1021/ja02242a004>.
- 750 (34) Qiu, J.; Yu, L.; Kirsch, L. E. Estimated PKa Values for Specific Amino Acid Residues in  
751 Daptomycin. *J Pharm Sci* **2011**, *100* (10), 4225–4233. <https://doi.org/10.1002/jps.22608>.
- 752 (35) Hillert, M. Le Chatelier's Principle - Restated and Illustrated with Phase Diagrams. *Journal*  
753 *of Phase Equilibria* **1995**, *16* (5), 403–410. <https://doi.org/10.1007/bf02645347>.
- 754 (36) Wamea, P.; Pitcher, M. L.; Muthami, J.; Sheikhi, A. Nanoengineering Cellulose for the  
755 Selective Removal of Neodymium: Towards Sustainable Rare Earth Element Recovery.  
756 *Chemical Engineering Journal* **2022**, *428*. <https://doi.org/10.1016/j.cej.2021.131086>.
- 757 (37) Chen, D. Z.; van de Ven, T. G. M. Flocculation Kinetics of Precipitated Calcium Carbonate  
758 Induced by Electrosterically Stabilized Nanocrystalline Cellulose. *Colloids and Surfaces a-*



- 759 *Physicochemical and Engineering Aspects* **2016**, *504*, 11–17.  
760 <https://doi.org/10.1016/j.colsurfa.2016.05.023>.
- 761 (38) Jung, D.; Powers, J. P.; Straus, S. K.; Hancock, R. E. Lipid-Specific Binding of the Calcium-  
762 Dependent Antibiotic Daptomycin Leads to Changes in Lipid Polymorphism of Model  
763 Membranes. *Chem Phys Lipids* **2008**, *154* (2), 120–128.  
764 <https://doi.org/10.1016/j.chemphyslip.2008.04.004>.
- 765 (39) Coster, H. G. L. The Physics of Cell Membranes. *Journal of Biological Physics* **2003**, *29*  
766 (4), 363–399. <https://doi.org/10.1023/a:1027362704125>.
- 767 (40) Seddon, J. M.; Templer, R. H.; Warrender, N. A.; Huang, Z.; Cevc, G.; Marsh, D.  
768 Phosphatidylcholine Fatty Acid Membranes: Effects of Headgroup Hydration on the Phase  
769 Behaviour and Structural Parameters of the Gel and Inverse Hexagonal (H-II) Phases.  
770 *Biochimica Et Biophysica Acta-Biomembranes* **1997**, *1327* (1), 131–147.  
771 [https://doi.org/10.1016/s0005-2736\(97\)00047-3](https://doi.org/10.1016/s0005-2736(97)00047-3).
- 772 (41) Reder-Christ, K.; Falkenstein-Paul, H.; Klocek, G.; Al-Kaddah, S.; Bakowsky, U.; Bendas,  
773 G. Model Membrane Approaches to Determine the Role of Calcium for the Antimicrobial  
774 Activity of Friulimicin. *Int J Antimicrob Agents* **2011**, *37* (3), 256–260.  
775 <https://doi.org/10.1016/j.ijantimicag.2010.11.024>.

- 776 (42) Insull, W. Clinical Utility of Bile Acid Sequestrants in the Treatment of Dyslipidemia: A  
777 Scientific Review. *Southern Medical Journal* **2006**, *99* (3), 257–273.  
778 <https://doi.org/10.1097/01.smj.0000208120.73327.db>.
- 779 (43) Senderovich, H.; Ghassem Khani, E. The Role of Bile Acid Sequestrant in Diarrhea  
780 Management: Too Good to Be True? *Journal of Clinical Gastroenterology and Hepatology*  
781 **2018**, *02* (03). <https://doi.org/10.21767/2575-7733.1000048>.
- 782 (44) Naumann, S.; Schweiggert-Weisz, U.; Bader-Mittermaier, S.; Haller, D.; Eisner, P.  
783 Differentiation of Adsorptive and Viscous Effects of Dietary Fibres on Bile Acid Release  
784 by Means of In Vitro Digestion and Dialysis. *Int J Mol Sci* **2018**, *19* (8).  
785 <https://doi.org/10.3390/ijms19082193>.
- 786 (45) Clulow, A. J.; Parrow, A.; Hawley, A.; Khan, J.; Pham, A. C.; Larsson, P.; Bergström, C.  
787 A. S.; Boyd, B. J. Characterization of Solubilizing Nanoaggregates Present in Different  
788 Versions of Simulated Intestinal Fluid. *Journal of Physical Chemistry B* **2017**, *121* (48),  
789 10869–10881. <https://doi.org/10.1021/acs.jpcc.7b08622>.

790

791

792

793

794 **TOC**

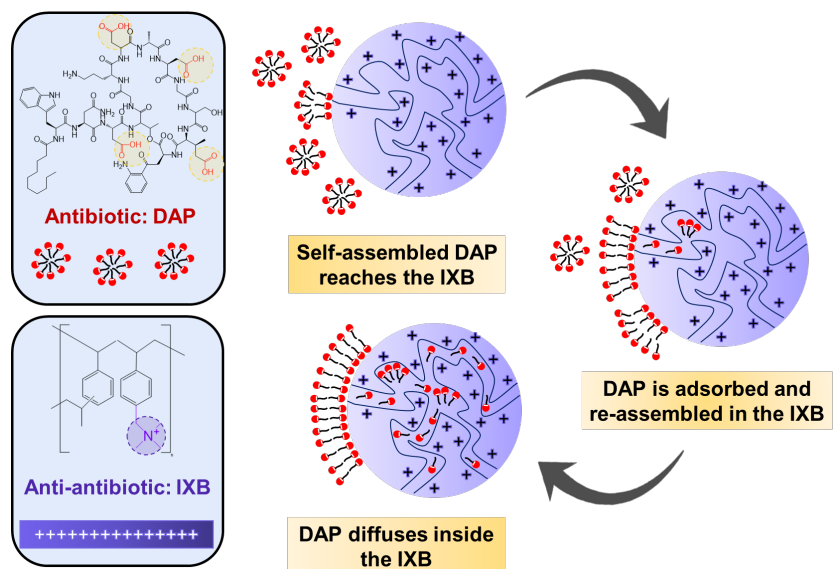

795

796

797

798
